# Supplementary material for: Integrated tumor stromal features of hepatocellular carcinoma reveals two distinct subtypes with prognostic/predictive significance
Source: publisher site journal article supplement (doi:10.18632/aging.102064), 2019-07-12
Supplement: Supplementary file [file aging-v11i13-102064-supplementary-material-SD3.pdf]

## SUPPLEMENTARY TABLES

**Supplementary Table 1. Antibody sources and staining conditions.**

| Markers       | Antibody source               | Species           | Dilution | Antigen retrieval buffer                |
|---------------|-------------------------------|-------------------|----------|-----------------------------------------|
| CD31          | Abcam, ab28364                | Rabbit monoclonal | 1:200    | Citrate buffer (pH 6.0) microwave 16min |
| CD34          | Abcam, ab81289                | Rabbit monoclonal | 1:200    | Citrate buffer (pH 6.0) microwave 16min |
| Podoplanin    | Abcam, ab77854                | Mouse monoclonal  | 1:200    | Citrate buffer (pH 6.0) microwave 16min |
| $\alpha$ -SMA | Abcam, ab5694                 | Rabbit monoclonal | 1:200    | Citrate buffer (pH 6.0) microwave 16min |
| CD68          | DAKO, M087601-2               | Mouse monoclonal  | 1:200    | Citrate buffer (pH 6.0) microwave 16min |
| FOXP3         | Abcam, ab20034                | Mouse monoclonal  | 1:100    | Citrate buffer (pH 6.0) microwave 16min |
| CD3           | Abcam, ab16669                | Rabbit monoclonal | 1:200    | Citrate buffer (pH 6.0) microwave 16min |
| CD8           | Abcam, ab33786                | Mouse monoclonal  | 1:200    | Citrate buffer (pH 6.0) microwave 16min |
| TIM3          | R&D Systems, AF2365-SP        | Goat monoclonal   | 1:100    | Citrate buffer (pH 6.0) microwave 16min |
| LAG3          | LifeSpan Bioscience, LS-B2237 | Mouse monoclonal  | 1:100    | Citrate buffer (pH 6.0) microwave 16min |
| PDL1          | CST, #13684                   | Rabbit monoclonal | 1:200    | Citrate buffer (pH 6.0) microwave 16min |
| PDCD1         | Abcam, ab52587                | Mouse monoclonal  | 1:50     | Citrate buffer (pH 6.0) microwave 16min |
| OX40          | Abcam, ab119904               | Rabbit monoclonal | 1:100    | Citrate buffer (pH 6.0) microwave 16min |
| E-cadherin    | Santa Cruz, sc-8426           | Mouse monoclonal  | 1:100    | Citrate buffer (pH 6.0) microwave 16min |
| Vimentin      | Santa Cruz, sc-6260           | Mouse monoclonal  | 1:100    | Citrate buffer (pH 6.0) microwave 16min |

**Supplementary Table 2. Clinicopathological characteristics of patients in the Validation cohort.**

| <b>Variables</b>       | <b>Validation cohort (n = 120)</b> |
|------------------------|------------------------------------|
| Age, years             | 51.2 ± 11.1                        |
| Gender                 |                                    |
| Male                   | 104 (86.7%)                        |
| Female                 | 16 (13.3%)                         |
| HBV infection          |                                    |
| Negative               | 18 (15.0%)                         |
| Positive               | 102 (85.0%)                        |
| HBV-DNA, IU/mL         |                                    |
| <10 <sup>3</sup>       | 45 (37.5%)                         |
| ≥10 <sup>3</sup>       | 75 (62.5%)                         |
| AFP, ng/mL             |                                    |
| <400                   | 71 (59.2%)                         |
| ≥400                   | 49 (40.8%)                         |
| Preoperative ALT, IU/L | 41.7 ± 35.5                        |
| Preoperative AST, IU/L | 45.6 ± 28.9                        |
| ALBI Grade 1/2         |                                    |
| Grade 1                | 94 (79.0%)                         |
| Grade 2                | 25 (21.0%)                         |
| FIB-4 score            |                                    |
| Grade 1                | 23 (19.2%)                         |
| Grade 2                | 57 (47.5%)                         |
| Grade 3                | 40 (33.3%)                         |
| Tumor number           |                                    |
| Single                 | 75 (62.5%)                         |
| Multiple               | 45 (37.5%)                         |
| Tumor size, cm         |                                    |
| <5                     | 43 (35.8%)                         |
| ≥5                     | 77 (64.2%)                         |
| AJCC-TNM Stage         |                                    |
| Stage I                | 47 (39.2%)                         |
| Stage II               | 31 (25.8%)                         |
| Stage III              | 42 (35.0%)                         |
| BCLC Classification    |                                    |
| A                      | 66 (55.0%)                         |
| B                      | 33 (27.5%)                         |
| C                      | 21 (17.5%)                         |
| Tumor differentiation  |                                    |
| Good                   | 105 (87.5%)                        |
| Poor                   | 15 (12.5%)                         |
| MVI                    |                                    |
| No                     | 78 (65.0%)                         |
| Yes                    | 42 (35.0%)                         |

HBV, hepatitis B virus; AFP, alpha fetoprotein; ALT, alanine aminotransferase; AST, aspartate aminotransferase; ALBI, albumin-bilirubin; FIB-4, Fibrosis 4 Score; AJCC, American Joint Committee on Cancer; BCLC, Barcelona Clinic Liver Cancer; MVI, microvascular invasion.

**Supplementary Table 3. Univariate analysis of the stromal features in three cohorts (disease-free survival).**

| Variables                           | Training cohort (n=161) |           |       | Testing cohort (n=160) |           |       | Validation cohort (n=120) |           |       |
|-------------------------------------|-------------------------|-----------|-------|------------------------|-----------|-------|---------------------------|-----------|-------|
|                                     | HR                      | 95%CI     | P     | HR                     | 95%CI     | P     | HR                        | 95%CI     | P     |
| $\alpha$ -SMA                       |                         |           |       |                        |           |       |                           |           |       |
| Weak                                | 1                       | 1         | 1     | 1                      | 1         | 1     | 1                         | 1         | 1     |
| Moderate                            | 1.19                    | 0.74–1.90 | 0.472 | 1.61                   | 1.01–2.56 | 0.047 | 1.21                      | 0.56–2.59 | 0.631 |
| Strong                              | 1.47                    | 0.74–2.93 | 0.274 | 3.46                   | 1.65–7.2  | 0.001 | 1.59                      | 0.46–5.48 | 0.463 |
| Stromal maturity                    |                         |           |       |                        |           |       |                           |           |       |
| Immature                            | 1                       | 1         | 1     | 1                      | 1         | 1     | 1                         | 1         | 1     |
| Intermediate                        | 0.99                    | 0.62–1.58 | 0.972 | 1.16                   | 0.72–1.85 | 0.546 | 0.41                      | 0.12–1.43 | 0.161 |
| Mature                              | 0.39                    | 0.19–0.81 | 0.012 | 0.41                   | 0.18–0.91 | 0.028 | 0.25                      | 0.06–0.96 | 0.044 |
| Stromal-tumor ratio                 |                         |           |       |                        |           |       |                           |           |       |
| > 50%                               | 1                       | 1         | 1     | 1                      | 1         | 1     | 1                         | 1         | 1     |
| ≤ 50%                               | 0.86                    | 0.54–1.38 | 0.536 | 0.48                   | 0.31–0.75 | 0.001 | 0.34                      | 0.15–0.74 | 0.006 |
| TIL-stromal ratio                   |                         |           |       |                        |           |       |                           |           |       |
| < 10%                               | 1                       | 1         | 1     | 1                      | 1         | 1     | 1                         | 1         | 1     |
| 10%–50%                             | 0.81                    | 0.51–1.28 | 0.364 | 0.79                   | 0.49–1.27 | 0.337 | 0.23                      | 0.08–0.65 | 0.006 |
| > 50%                               | 0.42                    | 0.19–0.94 | 0.035 | 0.48                   | 0.24–0.97 | 0.040 | 0.34                      | 0.12–0.97 | 0.044 |
| CD31                                |                         |           |       |                        |           |       |                           |           |       |
| Low (<5 vessels/mm <sup>2</sup> )   | 1                       | 1         | 1     | 1                      | 1         | 1     | 1                         | 1         | 1     |
| High (≥5 vessels/mm <sup>2</sup> )  | 1.12                    | 0.62–2.02 | 0.711 | 1.45                   | 0.67–3.16 | 0.345 | 0.95                      | 0.33–2.75 | 0.929 |
| CD34                                |                         |           |       |                        |           |       |                           |           |       |
| Low (<17 vessels/mm <sup>2</sup> )  | 1                       | 1         | 1     | 1                      | 1         | 1     | 1                         | 1         | 1     |
| High (≥17 vessels/mm <sup>2</sup> ) | 1.55                    | 0.98–2.46 | 0.063 | 1.53                   | 0.99–2.39 | 0.058 | 1.84                      | 0.89–3.79 | 0.099 |
| Podoplanin                          |                         |           |       |                        |           |       |                           |           |       |
| Low (<2 vessels/mm <sup>2</sup> )   | 1                       | 1         | 1     | 1                      | 1         | 1     | 1                         | 1         | 1     |
| High (≥2 vessels/mm <sup>2</sup> )  | 0.94                    | 0.61–1.46 | 0.792 | 0.94                   | 0.60–1.45 | 0.769 | 0.56                      | 0.27–1.13 | 0.103 |

HR, hazard ratio; CI, confidence interval.

**Supplementary Table 4. Univariate analysis in the training cohort.**

| Variables                            | Overall survival |            |        | Disease-free survival |           |        |
|--------------------------------------|------------------|------------|--------|-----------------------|-----------|--------|
|                                      | HR               | 95%CI      | P      | HR                    | 95%CI     | P      |
| Age, years                           | 1.00             | 0.98–1.02  | 0.917  | 1.00                  | 0.98–1.02 | 0.914  |
| Gender, female vs. male              | 0.90             | 0.52–1.55  | 0.704  | 1.35                  | 0.78–2.33 | 0.282  |
| HbsAg, positive vs. negative         | 1.27             | 0.67–2.40  | 0.460  | 1.29                  | 0.62–2.69 | 0.488  |
| HBV-DNA, >103 vs. ≤103 IU/mL         | 1.08             | 0.63–1.87  | 0.776  | 1.94                  | 1.13–3.34 | 0.017  |
| AFP, ≥400 ng/mL vs. <400 ng/mL       | 1.32             | 0.85–2.05  | 0.221  | 1.64                  | 1.06–2.53 | 0.026  |
| Preoperative ALT, IU/L               | 1.00             | 0.99–1.01  | 0.914  | 1.00                  | 0.99–1.01 | 0.926  |
| Preoperative AST, IU/L               | 1.00             | 1.00–1.01  | 0.341  | 1.00                  | 1.00–1.01 | 0.248  |
| ALBI Grade, Grade 2 vs. Grade 1      | 1.80             | 1.15–2.82  | 0.011  | 1.07                  | 0.67–1.71 | 0.774  |
| FIB-4 score                          |                  |            |        |                       |           |        |
| Grade 2 vs. Grade 1                  | 1.59             | 0.85–2.99  | 0.150  | 1.07                  | 0.54–2.10 | 0.849  |
| Grade 3 vs. Grade 1                  | 1.45             | 0.76–2.78  | 0.258  | 1.40                  | 0.73–2.65 | 0.309  |
| BCLC Classification                  |                  |            |        |                       |           |        |
| BCLC-B vs. BCLC-A                    | 1.25             | 0.70–2.24  | 0.450  | 1.98                  | 1.15–3.40 | 0.014  |
| BCLC-C vs. BCLC-A                    | 3.99             | 1.58–10.07 | 0.003  | 3.50                  | 1.59–7.70 | 0.002  |
| AJCC-TNM Stage                       |                  |            |        |                       |           |        |
| Stage II vs. stage I                 | 1.75             | 1.05–2.93  | 0.032  | 2.00                  | 1.17–3.42 | 0.012  |
| Stage III vs. stage I                | 1.21             | 0.70–2.09  | 0.491  | 2.92                  | 1.73–4.93 | <0.001 |
| Tumor differentiation, poor vs. good | 1.36             | 0.88–2.11  | 0.168  | 1.28                  | 0.83–1.98 | 0.263  |
| MVI, yes vs. no                      | 2.07             | 1.33–3.22  | 0.001  | 1.98                  | 1.27–3.08 | 0.003  |
| Stromal type, type B vs. type A      | 2.94             | 1.79–4.85  | <0.001 | 1.77                  | 1.11–2.80 | 0.016  |

HBV, hepatitis B virus; AFP, alpha fetoprotein; ALT, alanine aminotransferase; AST, aspartate aminotransferase; ALBI, albumin-bilirubin; FIB-4, Fibrosis 4 Score; BCLC, Barcelona Clinic Liver Cancer; AJCC, American Joint Committee on Cancer; MVI, microvascular invasion.

**Supplementary Table 5. Univariate analysis in the testing cohort.**

| Variables                                            | Overall survival |           |        | Disease-free survival |           |        |
|------------------------------------------------------|------------------|-----------|--------|-----------------------|-----------|--------|
|                                                      | HR               | 95%CI     | P      | HR                    | 95%CI     | P      |
| Age, years                                           | 1.00             | 0.98–1.02 | 0.986  | 0.99                  | 0.97–1.01 | 0.190  |
| Gender, female vs. male                              | 0.82             | 0.43–1.53 | 0.527  | 0.49                  | 0.25–0.95 | 0.035  |
| HbsAg, positive vs. negative                         | 1.55             | 0.72–3.36 | 0.266  | 1.72                  | 0.83–3.57 | 0.146  |
| HBV-DNA, >10 <sup>3</sup> vs. ≤10 <sup>3</sup> IU/mL | 2.30             | 1.28–4.13 | 0.006  | 0.95                  | 0.56–1.61 | 0.861  |
| AFP, ≥400 ng/mL vs. <400 ng/mL                       | 1.05             | 0.68–1.60 | 0.840  | 1.79                  | 1.16–2.79 | 0.009  |
| Preoperative ALT, IU/L                               | 1.00             | 1.00–1.01 | 0.129  | 1.00                  | 1.00–1.01 | 0.397  |
| Preoperative AST, IU/L                               | 1.01             | 1.00–1.01 | 0.032  | 1.00                  | 1.00–1.01 | 0.350  |
| ALBI Grade, Grade 2 vs. Grade 1                      | 1.46             | 0.94–2.26 | 0.088  | 1.44                  | 0.90–2.30 | 0.126  |
| FIB-4 score                                          |                  |           |        |                       |           |        |
| Grade 2 vs. Grade 1                                  | 1.30             | 0.69–2.44 | 0.414  | 1.28                  | 0.71–2.32 | 0.412  |
| Grade 3 vs. Grade 1                                  | 1.39             | 0.75–2.57 | 0.291  | 1.16                  | 0.63–2.13 | 0.640  |
| BCLC Classification                                  |                  |           |        |                       |           |        |
| BCLC-B vs. BCLC-A                                    | 2.37             | 1.42–3.94 | <0.001 | 1.57                  | 0.90–2.72 | 0.113  |
| BCLC-C vs. BCLC-A                                    | 2.44             | 1.05–5.67 | 0.038  | 2.60                  | 1.04–6.52 | 0.042  |
| AJCC-TNM Stage                                       |                  |           |        |                       |           |        |
| Stage II vs. stage I                                 | 2.45             | 1.46–4.12 | <0.001 | 2.13                  | 1.28–3.53 | 0.003  |
| Stage III vs. stage I                                | 2.82             | 1.69–4.73 | <0.001 | 1.30                  | 0.74–2.28 | 0.365  |
| Tumor differentiation, poor vs. good                 | 1.13             | 0.74–1.72 | 0.575  | 1.01                  | 0.64–1.58 | 0.969  |
| MVI, yes vs. no                                      | 2.09             | 1.37–3.20 | <0.001 | 2.22                  | 1.43–3.46 | <0.001 |
| Stromal type, type B vs. type A                      | 1.58             | 1.01–2.46 | 0.044  | 2.47                  | 1.51–4.05 | <0.001 |

HBV, hepatitis B virus; AFP, alpha fetoprotein; ALT, alanine aminotransferase; AST, aspartate aminotransferase; ALBI, albumin-bilirubin; FIB-4, Fibrosis 4 Score; BCLC, Barcelona Clinic Liver Cancer; AJCC, American Joint Committee on Cancer; MVI, microvascular invasion.

**Supplementary Table 6. Univariate analysis in the validation cohort.**

| Variables                            | Overall survival |            |       | Disease-free survival |           |       |
|--------------------------------------|------------------|------------|-------|-----------------------|-----------|-------|
|                                      | HR               | 95%CI      | P     | HR                    | 95%CI     | P     |
| Age, years                           | 1.00             | 0.96–1.04  | 0.946 | 0.99                  | 0.96–1.02 | 0.446 |
| Gender, female vs. male              | 2.30             | 0.76–6.94  | 0.140 | 1.36                  | 0.51–3.67 | 0.539 |
| HbsAg, positive vs. negative         | 1.82             | 0.42–7.85  | 0.424 | 0.91                  | 0.37–2.25 | 0.834 |
| HBV-DNA, >103/≤103 IU/mL             |                  |            |       |                       |           |       |
| AFP, ≥400 ng/mL vs. < 400 ng/mL      | 2.05             | 0.85–4.97  | 0.111 | 2.03                  | 0.94–4.41 | 0.072 |
| Preoperative ALT, IU/L               | 1.00             | 0.99–1.01  | 0.715 | 0.99                  | 0.98–1.00 | 0.121 |
| Preoperative AST, IU/L               | 1.00             | 1.00–1.01  | 0.252 | 1.00                  | 0.99–1.01 | 0.555 |
| ALBI Grade, Grade 2 vs. Grade 1      | 1.48             | 0.53–4.12  | 0.453 | 1.20                  | 0.51–2.82 | 0.677 |
| FIB-4 score                          |                  |            |       |                       |           |       |
| Grade 2 vs. Grade 1                  | 4.20             | 0.54–32.55 | 0.170 | 0.69                  | 0.27–1.75 | 0.431 |
| Grade 3 vs. Grade 1                  | 4.29             | 0.54–34.29 | 0.170 | 0.97                  | 0.37–2.53 | 0.952 |
| BCLC Classification                  |                  |            |       |                       |           |       |
| BCLC-B vs. BCLC-A                    | 1.77             | 0.62–5.07  | 0.289 | 0.93                  | 0.40–2.15 | 0.869 |
| BCLC-C vs. BCLC-A                    | 2.92             | 0.98–8.70  | 0.054 | 1.79                  | 0.72–4.47 | 0.209 |
| AJCC-TNM Stage                       |                  |            |       |                       |           |       |
| Stage II vs. stage I                 | 1.77             | 0.47–6.58  | 0.397 | 1.50                  | 0.59–3.80 | 0.395 |
| Stage III vs. stage I                | 2.53             | 0.67–9.53  | 0.169 | 1.10                  | 0.38–3.15 | 0.866 |
| Tumor differentiation, poor vs. good | 2.45             | 0.80–7.51  | 0.117 | 1.89                  | 0.88–4.08 | 0.103 |
| MVI, yes vs. no                      | 2.29             | 0.88–5.98  | 0.090 | 2.90                  | 1.41–5.96 | 0.004 |
| Stromal type, type B vs. type A      | 3.44             | 1.42–8.38  | 0.006 | 2.84                  | 1.37–5.89 | 0.005 |

HBV, hepatitis B virus; AFP, alpha fetoprotein; ALT, alanine aminotransferase; AST, aspartate aminotransferase; ALBI, albumin-bilirubin; FIB-4, Fibrosis 4 Score; BCLC, Barcelona Clinic Liver Cancer; AJCC, American Joint Committee on Cancer; MVI, microvascular invasion.

**Supplementary Table 7. Multivariable analysis in the testing cohort.**

| Variables in the final model            | Overall survival |           |       | Disease-free survival |           |       |
|-----------------------------------------|------------------|-----------|-------|-----------------------|-----------|-------|
|                                         | HR               | 95%CI     | P     | HR                    | 95%CI     | P     |
| AFP, $\geq 400$ ng/mL vs. $< 400$ ng/mL |                  |           |       | 1.41                  | 0.89–2.22 | 0.142 |
| ALBI Grade                              |                  |           |       |                       |           |       |
| Grade 2 vs. Grade 1                     | 3.14             | 1.29–7.64 | 0.012 |                       |           |       |
| BCLC Classification                     |                  |           |       |                       |           |       |
| BCLC-B vs. BCLC-A                       | 1.57             | 0.91–2.73 | 0.107 | 1.65                  | 0.95–2.87 | 0.076 |
| BCLC-C vs. BCLC-A                       | 2.63             | 1.08–6.42 | 0.034 | 3.05                  | 1.33–6.99 | 0.009 |
| MVI, Yes vs. no                         | 1.72             | 1.09–2.71 | 0.021 | 1.54                  | 0.95–2.50 | 0.081 |
| Stromal type, type B vs. type A         | 2.27             | 1.39–3.69 | 0.001 | 1.81                  | 1.14–2.90 | 0.013 |

AFP, alpha fetoprotein; ALBI, albumin-bilirubin; BCLC, Barcelona Clinic Liver Cancer; MVI, microvascular invasion. HR, hazard ratio; CI, confidence interval.

**Supplementary Table 8. Multivariable analysis in the validation cohort.**

| Variables in the final model            | Overall survival |            |           | Disease-free survival |            |       |
|-----------------------------------------|------------------|------------|-----------|-----------------------|------------|-------|
|                                         | HR               | 95%CI      | P         | HR                    | 95%CI      | P     |
| AFP, $\geq 400$ ng/mL vs. $< 400$ ng/mL |                  |            |           | 2.42                  | 1.13–5.19  | 0.023 |
| ALBI Grade                              |                  |            |           |                       |            |       |
| Grade 2 vs. Grade 1                     | 3.09             | 0.89–10.69 | 0.075     |                       |            |       |
| BCLC Classification                     |                  |            |           |                       |            |       |
| BCLC-B vs. BCLC-A                       | 2.54             | 0.88–7.34  | 0.085     | 2.30                  | 1.00–5.30  | 0.049 |
| BCLC-C vs. BCLC-A                       | 9.91             | 2.60–37.74 | $< 0.001$ | 8.59                  | 1.97–37.55 | 0.004 |
| MVI, Yes vs. no                         | 1.48             | 0.91–2.38  | 0.112     | 2.57                  | 1.12–5.91  | 0.026 |
| Stromal type, type B vs. type A         | 3.80             | 1.37–10.55 | 0.011     | 2.59                  | 1.21–5.58  | 0.015 |

AFP, alpha fetoprotein; ALBI, albumin-bilirubin; BCLC, Barcelona Clinic Liver Cancer; MVI, microvascular invasion. HR, hazard ratio; CI, confidence interval.
